# Supplementary material for: Cross-species analysis of apical asparagine-rich protein of Plasmodium vivax and Plasmodium knowlesi
Source: PubMed Central journal article supplement (PMC5893618; doi:10.1038/s41598-018-23728-1), 2018-04-10
Supplement: 41598_2018_23728_MOESM1_ESM.pdf [file 41598_2018_23728_MOESM1_ESM.pdf]

## Supplementary information

### Title

Cross-species analysis of apical asparagine-rich protein of *Plasmodium vivax* and *Plasmodium knowlesi*

### Author names and affiliations

Fauzi Muh<sup>1</sup>, Md Atique Ahmed<sup>1</sup>, Jin-Hee Han<sup>1</sup>, Myat Htut Nyunt<sup>1,2</sup>, Seong-Kyun Lee<sup>1</sup>, Yee Ling Lau<sup>3</sup>, Osamu Kaneko<sup>4</sup>, Eun-Taek Han<sup>1,\*</sup>

Supplementary Fig. 1

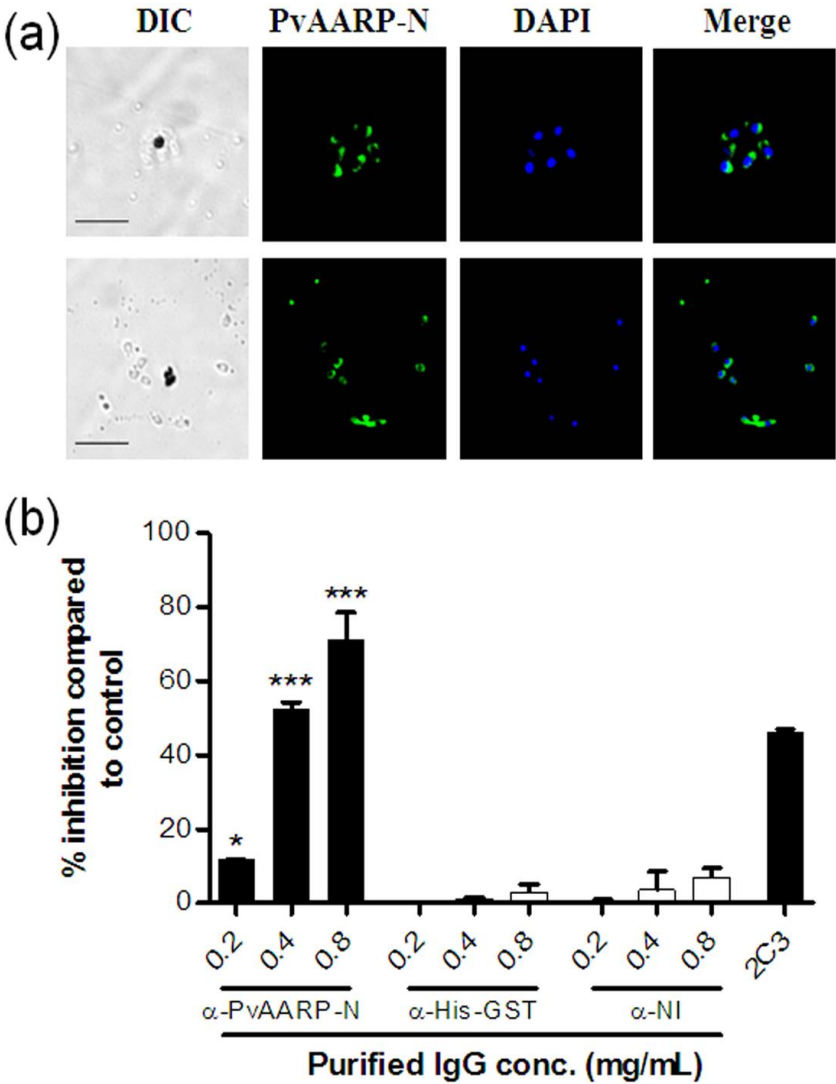

**Supplementary Fig. S1** Immunofluorescence (A) and invasion inhibition activity of anti-PvAARP-N in *P. knowlesi* H strain into monkey erythrocytes (B). Significant different \*,  $p$  value < 0.05; \*\*,  $p$  value < 0.01; \*\*\*,  $p$  value < 0.001 compared to anti-His-GST. DAPI, 4',6-diaminidino-2-phenylindole. Bars indicate 5  $\mu$ m.

**Supplementary Fig. 2**

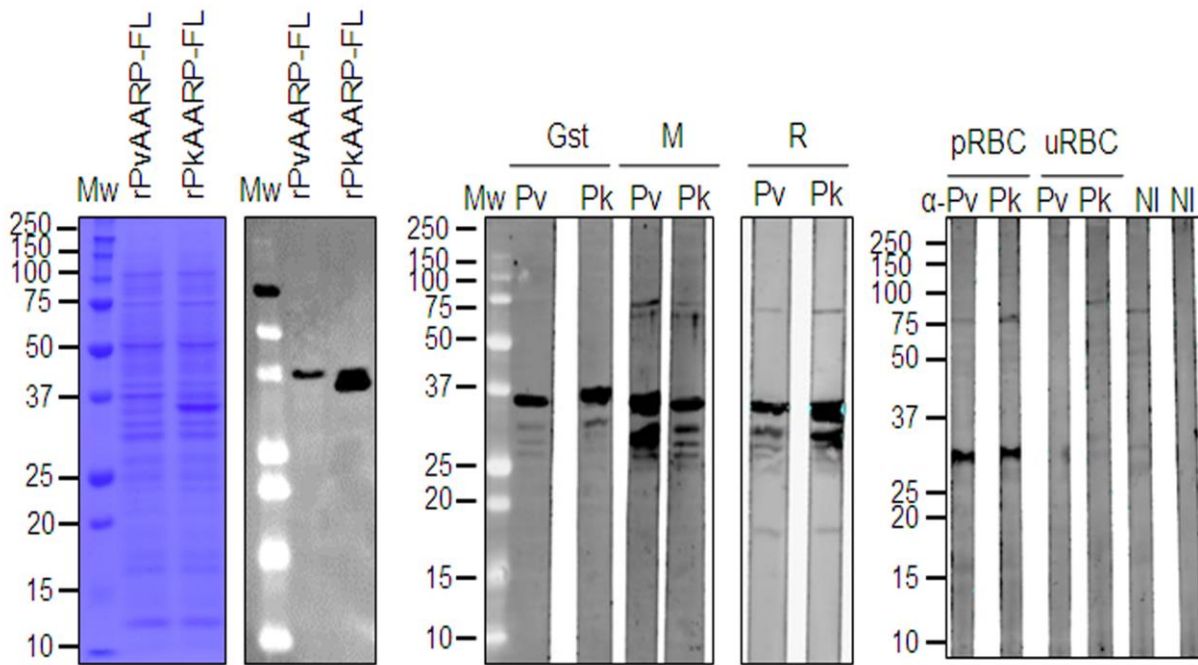

**Supplementary Fig. S2** Full length of SDS-PAGE and western blots analysis in Figure 2A-D. Pv, rPvAARP-N; Pk, rPkAARP-N, Gst, anti-GST antibody; M, mice antibody, R, rabbit antibody; NI, non-immunized antibody; pRBC, parasitized-red blood cells; uRBC, uninfected-red blood cells.
